# Supplementary material for: Antibody- and T Cell-Dependent Responses Elicited by a SARS-CoV-2 Adenoviral-Based Vaccine in a Socially Vulnerable Cohort of Elderly Individuals
Source: MDPI journal article supplement (doi:10.3390/vaccines10060937), 2022-06-13
Supplement: s1 [file s1]

## Supplementary Material

**Table S1. Antibodies used to assess SARS-CoV-2-specific T cell-mediated immunity.**

| Antibody      | Fluorochrome | Clone/vendor/catalogue     |
|---------------|--------------|----------------------------|
| CD3           | BV510        | OKT3/Biolegend/317332      |
| CD4           | APCCy7       | OKT4/Biolegend/317418      |
| CD8           | PE           | RPA-T8/Biolegend/301064    |
| CD154         | FITC         | 24-31/Biolegend/310804     |
| IFN- $\gamma$ | PerCP-Cy5.5  | 4S.B3/Biolegend/505822     |
| TNF- $\alpha$ | PECy7        | MAb11/Biolegend/502930     |
| IL-2          | APC          | MQ1-17H12/Biolegend/500310 |
